# Supplementary material for: Association of physical activity with lung function in lung-healthy German adults: results from the KORA FF4 study
Source: Springer Nature journal article supplement (doi:10.1186/s12890-017-0562-8), 2017-12-01
Supplement: MOESM1 [file 15334214]

## Additional file 1: Results of Tables S1 to S8

**Table S1** Population characteristics stratified by smoking status

|                                                      |                                                                            | <b>Never smokers<br/>(n=159)</b> | <b>Ex- and current<br/>smokers<br/>(n=182)</b> |
|------------------------------------------------------|----------------------------------------------------------------------------|----------------------------------|------------------------------------------------|
| <b>Sex*</b>                                          | n females (%)                                                              | 98 (61.6)                        | 91 (50.0)                                      |
| <b>Age</b>                                           | mean years (SD)                                                            | 57.6 (5.5)                       | 57.2 (5.5)                                     |
| <b>Height*</b>                                       | mean cm (SD)                                                               | 167.5 (9.7)                      | 169.9 (9.3)                                    |
| <b>Weight*</b>                                       | mean kg (SD)                                                               | 77.3 (16.6)                      | 80.9 (16.2)                                    |
| <b>BMI</b>                                           | n normal (BMI <25 BMI) (%)                                                 | 54 (34.0)                        | 52 (28.6)                                      |
|                                                      | n overweight (≥25 BMI <30) (%)                                             | 68 (42.8)                        | 76 (41.8)                                      |
|                                                      | n obese (BMI ≥30) (%)                                                      | 37 (23.3)                        | 54 (29.7)                                      |
| <b>Education</b>                                     | n low (<10 years of school) (%)                                            | 62 (39.0)                        | 90 (49.5)                                      |
|                                                      | n medium (=10 years of school) (%)                                         | 54 (34.0)                        | 46 (25.3)                                      |
|                                                      | n high (>10 years of school) (%)                                           | 43 (27.0)                        | 46 (25.3)                                      |
| <b>Hay fever</b>                                     | n yes (%)                                                                  | 33 (20.8)                        | 32 (17.6)                                      |
| <b>Problems in walking<br/>about/pain/discomfort</b> | n not at all/slight (%)                                                    | 133 (84.2)                       | 156 (85.7)                                     |
|                                                      | n moderate/extreme (%)                                                     | 25 (15.8)                        | 26 (14.3)                                      |
| <b>Lung function</b>                                 |                                                                            |                                  |                                                |
| <b>Z-score FEV<sub>1</sub></b>                       | mean (SD)                                                                  | 0.34 (0.92)                      | 0.24 (0.86)                                    |
| <b>Z-score FVC</b>                                   | mean (SD)                                                                  | 0.33 (0.84)                      | 0.32 (0.85)                                    |
| <b>Z-score FEV<sub>1</sub>/FVC</b>                   | mean (SD)                                                                  | -0.07 (0.61)                     | -0.20 (0.60)                                   |
| <b>Z-score FEF<sub>25-75</sub>*</b>                  | mean (SD)                                                                  | 0.08 (0.82)                      | -0.09 (0.76)                                   |
| <b>TLCO/VA*</b>                                      | mean mmol/min/kPa/l (SD)                                                   | 14.39 (1.68)                     | 13.85 (1.82)                                   |
| <b>PI<sub>max</sub>*</b>                             | mean kPa (SD)                                                              | 7.75 (2.86)                      | 8.36 (2.68)                                    |
| <b>Physical activity</b>                             |                                                                            |                                  |                                                |
| <b>MVPA among females</b>                            | median of mean minutes/day<br>(1 <sup>st</sup> , 3 <sup>rd</sup> quartile) | 28.7 (17.2; 49.6)                | 28.0 (17.5; 46.3)                              |
| <b>MVPA among males</b>                              | median of mean minutes/day<br>(1 <sup>st</sup> , 3 <sup>rd</sup> quartile) | 36.6 (23.1; 52.0)                | 33.0 (21.0; 48.7)                              |
| <b>MVPA quartiles</b>                                | n 1 <sup>st</sup> – least active (%)                                       | 38 (23.9)                        | 47 (25.8)                                      |
|                                                      | n 2 <sup>nd</sup> (%)                                                      | 37 (23.3)                        | 48 (26.4)                                      |
|                                                      | n 3 <sup>rd</sup> (%)                                                      | 41 (25.8)                        | 44 (24.2)                                      |
|                                                      | n 4 <sup>th</sup> – most active (%)                                        | 43 (27.0)                        | 43 (23.6)                                      |
| <b>10-minute bout of<br/>MVPA achieved</b>           | n yes (%)                                                                  | 109 (68.6)                       | 115 (63.2)                                     |
| <b>WHO threshold<br/>achieved</b>                    | n yes (%)                                                                  | 26 (16.4)                        | 24 (13.2)                                      |

\*p<0.05 between never and ex-/current smokers.

SD: standard deviation. BMI: body mass index. FEV<sub>1</sub>: forced expiratory volume in 1 second. FVC: forced vital capacity. FEF<sub>25-75</sub>: forced expiratory flow between 25% and 75% of FVC. TLCO/VA: transfer factor of the lung for carbon monoxide adjusted for hemoglobin and divided by alveolar volume. P<sub>I</sub><sub>max</sub>: maximum inspiratory mouth pressure. MVPA: moderate to vigorous physical activity. WHO: World Health Organization.

**Table S2** Comparison of subjects included in the present analysis compared to all other participants of the “Lung Health & physical activity” study performing spirometry

|                                               |                                    | <b>Analyzed population<br/>(n=341)</b> | <b>“Lung Health &amp; physical activity” study participants<br/>with spirometry<br/>(n=669)</b> |
|-----------------------------------------------|------------------------------------|----------------------------------------|-------------------------------------------------------------------------------------------------|
| Sex                                           | n female (%)                       | 189 (55.4)                             | 346 (51.7)                                                                                      |
| Age*                                          | mean years (SD)                    | 57.4 (5.5)                             | 58.4 (5.8)                                                                                      |
| Height                                        | mean cm (SD)                       | 168.7 (9.6)                            | 169.3 (9.3)                                                                                     |
| Weight                                        | mean kg (SD)                       | 79.2 (16.4)                            | 81.0 (18.4)                                                                                     |
| BMI                                           | n normal (BMI <25 BMI) (%)         | 106 (31.1)                             | 194 (29.0)                                                                                      |
|                                               | n overweight (≥25 BMI <30) (%)     | 144 (42.2)                             | 273 (40.8)                                                                                      |
|                                               | n obese (BMI ≥30) (%)              | 91 (26.7)                              | 202 (30.2)                                                                                      |
| Smoking status*                               | n never smokers (%)                | 159 (46.6)                             | 253 (37.8)                                                                                      |
|                                               | n ex-smokers (%)                   | 135 (39.6)                             | 280 (41.9)                                                                                      |
|                                               | n current smokers (%)              | 47 (13.8)                              | 136 (20.3)                                                                                      |
| Education                                     | n low (<10 years of school) (%)    | 152 (44.6)                             | 325 (48.8)                                                                                      |
|                                               | n medium (=10 years of school) (%) | 100 (29.3)                             | 164 (24.6)                                                                                      |
|                                               | n high (>10 years of school) (%)   | 89 (26.1)                              | 177 (26.6)                                                                                      |
| Hay fever                                     | n yes (%)                          | 65 (19.1)                              | 140 (20.9)                                                                                      |
| Asthma                                        | n yes (%)                          | -                                      | 98 (14.6)                                                                                       |
| COPD or emphysema                             | n yes (%)                          | -                                      | 83 (12.4)                                                                                       |
| Problems in walking<br>about/pain/discomfort* | n not at all/slight (%)            | 289 (85.0)                             | 530 (79.3)                                                                                      |
|                                               | n moderate/extreme (%)             | 51 (15.0)                              | 138 (20.7)                                                                                      |

\*p<0.05 between study population analyzed and all other subjects participating in spirometry. SD: standard deviation. BMI: body mass index. COPD: chronic obstructive pulmonary disease.

**Table S3** Association of physical activity with GLI z-scores for spirometric parameters

|                               | MVPA | Total population <sup>a</sup><br>(n=341) |                  | Never smokers<br>(n=159) |                  | Ex- and current smokers <sup>b</sup><br>(n=182) |                  |
|-------------------------------|------|------------------------------------------|------------------|--------------------------|------------------|-------------------------------------------------|------------------|
|                               |      | Quartile                                 | $\beta$ (95% CI) | p-value                  | $\beta$ (95% CI) | p-value                                         | $\beta$ (95% CI) |
| Z-score FEV <sub>1</sub>      | 2    | 0.17 (-0.10, 0.43)                       | 0.21             | 0.08 (-0.34, 0.49)       | 0.72             | 0.26 (-0.08, 0.60)                              | 0.14             |
|                               | 3    | <b>0.27 (0.01, 0.53)</b>                 | <b>0.05</b>      | 0.35 (-0.06, 0.76)       | 0.10             | 0.20 (-0.15, 0.55)                              | 0.26             |
|                               | 4    | <b>0.34 (0.07, 0.60)</b>                 | <b>0.01</b>      | 0.20 (-0.20, 0.60)       | 0.33             | <b>0.48 (0.12, 0.83)</b>                        | <b>0.01</b>      |
| Z-score FVC                   | 2    | 0.18 (-0.06, 0.43)                       | 0.14             | 0.10 (-0.27, 0.47)       | 0.60             | 0.27 (-0.06, 0.60)                              | 0.11             |
|                               | 3    | 0.21 (-0.04, 0.46)                       | 0.10             | 0.34 (-0.02, 0.71)       | 0.07             | 0.09 (-0.24, 0.43)                              | 0.59             |
|                               | 4    | <b>0.31 (0.06, 0.56)</b>                 | <b>0.01</b>      | 0.18 (-0.18, 0.54)       | 0.33             | <b>0.45 (0.10, 0.80)</b>                        | <b>0.01</b>      |
| Z-score FEV <sub>1</sub> /FVC | 2    | -0.04 (-0.22, 0.14)                      | 0.65             | -0.04 (-0.32, 0.23)      | 0.76             | -0.04 (-0.27, 0.20)                             | 0.77             |
|                               | 3    | 0.09 (-0.09, 0.26)                       | 0.35             | -0.01 (-0.29, 0.26)      | 0.93             | 0.17 (-0.07, 0.41)                              | 0.18             |
|                               | 4    | 0.04 (-0.14, 0.22)                       | 0.63             | 0.03 (-0.24, 0.30)       | 0.85             | 0.06 (-0.19, 0.31)                              | 0.64             |
| Z-score FEF <sub>25-75</sub>  | 2    | 0.08 (-0.16, 0.31)                       | 0.52             | -0.01 (-0.38, 0.37)      | 0.97             | 0.16 (-0.14, 0.46)                              | 0.31             |
|                               | 3    | <b>0.25 (0.01, 0.48)</b>                 | <b>0.04</b>      | 0.21 (-0.16, 0.57)       | 0.27             | 0.27 (-0.04, 0.58)                              | 0.09             |
|                               | 4    | 0.18 (-0.06, 0.41)                       | 0.15             | 0.01 (-0.27, 0.46)       | 0.61             | 0.26 (-0.06, 0.58)                              | 0.11             |

All models were adjusted for weight, education level, and a doctor's diagnosis of hay fever.

<sup>a</sup>additionally adjusted for smoking status categorized as *never*, *ex-*, or *current* smokers.

<sup>b</sup>additionally adjusted for smoking status categorized as *ex-* or *current* smokers.

GLI: Global Lung Function Initiative. MVPA: moderate to vigorous physical activity. CI: confidence interval.

FEV<sub>1</sub>: forced expiratory volume in 1 second. FVC: forced vital capacity. FEF<sub>25-75</sub>: forced expiratory flow between 25% and 75% of FVC.

**Table S4** Sex-stratified results of linear regression models

|                                                    |          | Males (n=152)               |             | Females (n=189)          |             |
|----------------------------------------------------|----------|-----------------------------|-------------|--------------------------|-------------|
|                                                    |          | $\beta$ (95% CI)            | p-value     | $\beta$ (95% CI)         | p-value     |
| <b>MVPA</b>                                        | Quartile |                             |             |                          |             |
| FEV <sub>1</sub> , ml                              | 2        | 44 (-160, 248)              | 0.68        | 113 (-22, 247)           | 0.10        |
|                                                    | 3        | 45 (-158, 248)              | 0.66        | <b>202 (66, 339)</b>     | <b>0.00</b> |
|                                                    | 4        | 60 (-148, 268)              | 0.57        | <b>209 (73, 345)</b>     | <b>0.00</b> |
| FVC, ml                                            | 2        | 52 (-192, 297)              | 0.67        | 144 (-26, 314)           | 0.10        |
|                                                    | 3        | -72 (-315, 171)             | 0.56        | <b>255 (83, 428)</b>     | <b>0.00</b> |
|                                                    | 4        | 88 (-161, 337)              | 0.49        | <b>210 (38, 381)</b>     | <b>0.02</b> |
| FEV <sub>1</sub> /FVC, %                           | 2        | -0.10 (-1.81, 1.6)          | 0.90        | 0.16 (-1.48, 1.80)       | 0.85        |
|                                                    | 3        | <b>2.04 (0.34, 3.75)</b>    | <b>0.02</b> | 0.15 (-1.52, 1.82)       | 0.86        |
|                                                    | 4        | -0.21 (-1.96, 1.53)         | 0.81        | 1.35 (-0.31, 3.01)       | 0.11        |
| Z-score FEV <sub>1</sub> /FVC                      | 2        | -0.02 (-0.27, 0.24)         | 0.90        | -0.04 (-0.28, 0.21)      | 0.77        |
|                                                    | 3        | <b>0.31 (0.05, 0.56)</b>    | <b>0.02</b> | -0.05 (-0.30, 0.20)      | 0.69        |
|                                                    | 4        | -0.05 (-0.3, 0.21)          | 0.73        | 0.17 (-0.08, 0.41)       | 0.20        |
| <b>10-minute bout of MVPA achieved, yes vs. no</b> |          |                             |             |                          |             |
| FEV <sub>1</sub> , ml                              |          | -70 (-229, 90)              | 0.39        | <b>154 (49, 259)</b>     | <b>0.00</b> |
| FVC, ml                                            |          | -121 (-312, 70)             | 0.22        | <b>157 (23, 290)</b>     | <b>0.02</b> |
| Z-score FEV <sub>1</sub>                           |          | -0.11 (-0.42, 0.20)         | 0.48        | <b>0.36 (0.08, 0.64)</b> | <b>0.01</b> |
| Z-score FVC                                        |          | -0.15 (-0.43, 0.14)         | 0.31        | <b>0.30 (0.04, 0.57)</b> | <b>0.03</b> |
| <b>WHO threshold achieved, yes vs. no</b>          |          |                             |             |                          |             |
| FEV <sub>1</sub> , ml                              |          | <b>-196 (-387, -5)</b>      | <b>0.05</b> | 105 (-39, 249)           | 0.15        |
| FVC, ml                                            |          | <b>-242 (-472, -12)</b>     | <b>0.04</b> | 79 (-103, 261)           | 0.39        |
| Z-score FEV <sub>1</sub>                           |          | <b>-0.38 (-0.75, 0.00)</b>  | <b>0.05</b> | 0.33 (-0.05, 0.71)       | 0.09        |
| Z-score FVC                                        |          | <b>-0.35 (-0.70, -0.01)</b> | <b>0.05</b> | 0.25 (-0.12, 0.61)       | 0.18        |

The models were adjusted for sex, age, height, weight, smoking status, education level, and a doctor's diagnosis of hay fever.

MVPA: moderate to vigorous physical activity. CI: confidence interval. FEV<sub>1</sub>: forced expiratory volume in 1 second. FVC: forced vital capacity. WHO: World Health Organization.

**Table S5** Association of physical activity with spirometric parameters with **adjustment for BMI instead of weight**

|                          | MVPA | Total population <sup>a</sup><br>(n=341) |             | Never smokers<br>(n=159) |         | Ex- and current smokers <sup>b</sup><br>(n=182) |             |
|--------------------------|------|------------------------------------------|-------------|--------------------------|---------|-------------------------------------------------|-------------|
|                          |      | β (95% CI)                               | p-value     | β (95% CI)               | p-value | β (95% CI)                                      | p-value     |
| FEV <sub>1</sub> , ml    | 2    | 71 (-45, 187)                            | 0.23        | 43 (-131, 216)           | 0.63    | 81 (-79, 240)                                   | 0.32        |
|                          | 3    | <b>124 (7, 242)</b>                      | <b>0.04</b> | 163 (-11, 337)           | 0.07    | 61 (-103, 225)                                  | 0.47        |
|                          | 4    | <b>141 (22, 259)</b>                     | <b>0.02</b> | 79 (-94, 252)            | 0.37    | <b>197 (31, 363)</b>                            | <b>0.02</b> |
| FVC, ml                  | 2    | 89 (-54, 233)                            | 0.22        | 45 (-162, 252)           | 0.67    | 113 (-89, 315)                                  | 0.27        |
|                          | 3    | 106 (-39, 251)                           | 0.15        | 183 (-25, 391)           | 0.09    | 13 (-195, 222)                                  | 0.90        |
|                          | 4    | <b>154 (8, 300)</b>                      | <b>0.04</b> | 68 (-139, 275)           | 0.52    | <b>231 (21, 441)</b>                            | <b>0.03</b> |
| FEV <sub>1</sub> /FVC, % | 2    | 0.03 (-1.16, 1.22)                       | 0.96        | -0.01 (-1.84, 1.82)      | 0.99    | -0.09 (-1.71, 1.53)                             | 0.91        |
|                          | 3    | 0.87 (-0.33, 2.07)                       | 0.16        | 0.36 (-1.48, 2.19)       | 0.70    | 1.06 (-0.61, 2.73)                              | 0.21        |
|                          | 4    | 0.65 (-0.56, 1.86)                       | 0.29        | 0.73 (-1.09, 2.56)       | 0.43    | 0.55 (-1.13, 2.23)                              | 0.52        |

All models were adjusted for sex, age, height, **body mass index**, education level, and a doctor's diagnosis of hay fever.

<sup>a</sup>additionally adjusted for smoking status categorized as *never*, *ex-*, or *current* smokers.

<sup>b</sup>additionally adjusted for smoking status categorized as *ex-* or *current* smokers.

BMI: body mass index. MVPA: moderate to vigorous physical activity. CI: confidence interval. FEV<sub>1</sub>: forced expiratory volume in 1 second. FVC: forced vital capacity. FEF<sub>25-75</sub>: forced expiratory flow between 25% and 75% of FVC.

**Table S6** Association of at least one 10-minute bout of MVPA achieved with spirometric parameters

|                                    | 10-minute bout of MVPA achieved, yes vs. no |         |                          |         |                                                 |         |
|------------------------------------|---------------------------------------------|---------|--------------------------|---------|-------------------------------------------------|---------|
|                                    | Total population <sup>a</sup><br>(n=341)    |         | Never smokers<br>(n=159) |         | Ex- and current smokers <sup>b</sup><br>(n=182) |         |
|                                    | $\beta$ (95% CI)                            | p-value | $\beta$ (95% CI)         | p-value | $\beta$ (95% CI)                                | p-value |
| <b>FEV<sub>1</sub>, ml</b>         | 36 (-52, 125)                               | 0.42    | 74 (-59, 207)            | 0.28    | 22 (-98, 141)                                   | 0.72    |
| <b>FVC, ml</b>                     | 27 (-82, 136)                               | 0.62    | 44 (-116, 203)           | 0.59    | 33 (-118, 185)                                  | 0.67    |
| <b>FEV<sub>1</sub>/FVC, %</b>      | 0.39 (-0.51, 1.29)                          | 0.40    | 1.19 (-0.18, 2.57)       | 0.09    | -0.23 (-1.43, 0.98)                             | 0.71    |
| <b>FEF<sub>25-75</sub>, ml/s</b>   | 49 (-118, 216)                              | 0.57    | 157 (-92, 405)           | 0.22    | -28 (-253, 197)                                 | 0.81    |
| <b>Z-score FEV<sub>1</sub></b>     | 0.13 (-0.07, 0.33)                          | 0.21    | 0.16 (-0.16, 0.47)       | 0.33    | 0.12 (-0.15, 0.38)                              | 0.39    |
| <b>Z-score FVC</b>                 | 0.11 (-0.08, 0.30)                          | 0.24    | 0.08 (-0.20, 0.36)       | 0.58    | 0.15 (-0.11, 0.41)                              | 0.25    |
| <b>Z-score FEV<sub>1</sub>/FVC</b> | 0.03 (-0.10, 0.17)                          | 0.63    | 0.12 (-0.09, 0.33)       | 0.26    | -0.04 (-0.22, 0.14)                             | 0.64    |
| <b>Z-score FEF<sub>25-75</sub></b> | 0.08 (-0.10, 0.26)                          | 0.38    | 0.17 (-0.11, 0.45)       | 0.23    | -0.01 (-0.24, 0.22)                             | 0.94    |

The models were adjusted for sex, age, height, weight, education level, and a doctor's diagnosis of hay fever.

<sup>a</sup>additionally adjusted for smoking status categorized as *never*, *ex-*, or *current* smokers.

<sup>b</sup>additionally adjusted for smoking status categorized as *ex-* or *current* smokers.

MVPA: moderate to vigorous physical activity. CI: confidence interval. FEV<sub>1</sub>: forced expiratory volume in 1 second. FVC: forced vital capacity. FEF<sub>25-75</sub>: forced expiratory flow between 25% and 75% of FVC.

**Table S7** Association of the achievement of WHO threshold with spirometric parameters

|                                    | WHO threshold achieved, yes vs. no       |         |                          |         |                                                 |             |
|------------------------------------|------------------------------------------|---------|--------------------------|---------|-------------------------------------------------|-------------|
|                                    | Total population <sup>a</sup><br>(n=341) |         | Never smokers<br>(n=159) |         | Ex- and current smokers <sup>b</sup><br>(n=182) |             |
|                                    | $\beta$ (95% CI)                         | p-value | $\beta$ (95% CI)         | p-value | $\beta$ (95% CI)                                | p-value     |
| <b>FEV<sub>1</sub>, ml</b>         | -35 (-153, 82)                           | 0.56    | 60 (-107, 226)           | 0.48    | -142 (-312, 27)                                 | 0.10        |
| <b>FVC, ml</b>                     | -69 (-214, 75)                           | 0.35    | 56 (-143, 254)           | 0.58    | <b>-220 (-434, -6)</b>                          | <b>0.05</b> |
| <b>FEV<sub>1</sub>/FVC, %</b>      | 0.45 (-0.75, 1.65)                       | 0.46    | 0.42 (-1.31, 2.15)       | 0.64    | 0.65 (-1.07, 2.37)                              | 0.46        |
| <b>FEF<sub>25-75</sub>, ml/s</b>   | -31 (-255, 193)                          | 0.79    | 18 (-299, 335)           | 0.91    | -62 (-383, 260)                                 | 0.71        |
| <b>Z-score FEV<sub>1</sub></b>     | 0.01 (-0.25, 0.28)                       | 0.93    | 0.24 (-0.15, 0.63)       | 0.23    | -0.24 (-0.61, 0.13)                             | 0.20        |
| <b>Z-score FVC</b>                 | -0.01 (-0.26, 0.24)                      | 0.91    | 0.21 (-0.14, 0.55)       | 0.24    | -0.26 (-0.62, 0.10)                             | 0.16        |
| <b>Z-score FEV<sub>1</sub>/FVC</b> | 0.04 (-0.14, 0.22)                       | 0.66    | 0.01 (-0.25, 0.27)       | 0.94    | 0.07 (-0.18, 0.33)                              | 0.57        |
| <b>Z-score FEF<sub>25-75</sub></b> | 0.01 (-0.22, 0.25)                       | 0.92    | 0.08 (-0.27, 0.43)       | 0.66    | -0.06 (-0.39, 0.26)                             | 0.70        |

The models were adjusted for sex, age, height, weight, education level, and a doctor's diagnosis of hay fever.

<sup>a</sup>additionally adjusted for smoking status categorized as *never*, *ex-*, or *current* smokers.

<sup>b</sup>additionally adjusted for smoking status categorized as *ex-* or *current* smokers.

WHO: World Health Organization. CI: confidence interval. FEV<sub>1</sub>: forced expiratory volume in 1 second. FVC: forced vital capacity. FEF<sub>25-75</sub>: forced expiratory flow between 25% and 75% of FVC.

**Table S8** Association of physical activity with pulmonary gas exchange and inspiratory muscle strength according to smoking status

|                                                    | Pulmonary gas exchange (TLCO/VA),<br>10 <sup>-1</sup> mmol/min/kPa/l |             |                                                 |         | Maximum inspiratory mouth pressure (PI <sub>max</sub> ),<br>kPa |             |                                                 |         |
|----------------------------------------------------|----------------------------------------------------------------------|-------------|-------------------------------------------------|---------|-----------------------------------------------------------------|-------------|-------------------------------------------------|---------|
|                                                    | Never smokers<br>(n=151)                                             |             | Ex- and current smokers <sup>a</sup><br>(n=171) |         | Never smokers<br>(n=155)                                        |             | Ex- and current smokers <sup>a</sup><br>(n=176) |         |
|                                                    | β (95% CI)                                                           | p-value     | β (95% CI)                                      | p-value | β (95% CI)                                                      | p-value     | β (95% CI)                                      | p-value |
| <b>MVPA quartiles<sup>a</sup></b>                  |                                                                      |             |                                                 |         |                                                                 |             |                                                 |         |
| 1 <sup>st</sup> – least active vs.                 |                                                                      |             |                                                 |         |                                                                 |             |                                                 |         |
| 2 <sup>nd</sup>                                    | -0.26 (-0.93, 0.42)                                                  | 0.45        | 0.22 (-0.47, 0.91)                              | 0.53    | 0.85 (-0.21, 1.92)                                              | 0.12        | 0.01 (-0.96, 0.98)                              | 0.98    |
| 3 <sup>rd</sup>                                    | <b>-0.81 (-1.50, -0.13)</b>                                          | <b>0.02</b> | 0.12 (-0.61, 0.85)                              | 0.75    | 0.84 (-0.22, 1.91)                                              | 0.12        | -0.20 (-1.20, 0.80)                             | 0.70    |
| 4 <sup>th</sup> – most active                      | -0.05 (-0.73, 0.64)                                                  | 0.90        | 0.47 (-0.27, 1.20)                              | 0.21    | 0.17 (-0.90, 1.23)                                              | 0.76        | -0.01 (-1.05, 1.02)                             | 0.98    |
| <b>10-minute bout of MVPA achieved, yes vs. no</b> |                                                                      |             |                                                 |         |                                                                 |             |                                                 |         |
|                                                    | 0.00 (-0.54, 0.53)                                                   | 0.99        | -0.09 (-0.61, 0.42)                             | 0.72    | <b>0.93 (0.11, 1.74)</b>                                        | <b>0.03</b> | 0.37 (-0.35, 1.09)                              | 0.32    |
| <b>WHO threshold achieved, yes vs. no</b>          |                                                                      |             |                                                 |         |                                                                 |             |                                                 |         |
|                                                    | 0.12 (-0.55, 0.79)                                                   | 0.72        | 0.56 (-0.16, 1.28)                              | 0.13    | 0.50 (-0.51, 1.51)                                              | 0.33        | -0.51 (-1.55, 0.53)                             | 0.33    |

All models were adjusted for sex, age, height, weight, education level, and a doctor's diagnosis of hay fever.

<sup>a</sup>additionally adjusted for smoking status categorized as *ex-* or *current* smokers.

TLCO/VA: transfer factor of the lung for carbon monoxide adjusted for hemoglobin and divided by alveolar volume. PI<sub>max</sub>: maximum inspiratory mouth pressure. CI: confidence interval. MVPA: moderate to vigorous physical activity. WHO: World Health Organization.
